# Supplementary figures and images for: Headpiece-assisted DNA data storage in solution and solid
Source: Royal Society of Chemistry journal article supplement (doi:10.1039/d4cc05109b), 2024-12-03

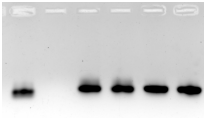

Supplement: d4cc05109b10.pdf [file d4cc05109b10.pdf]

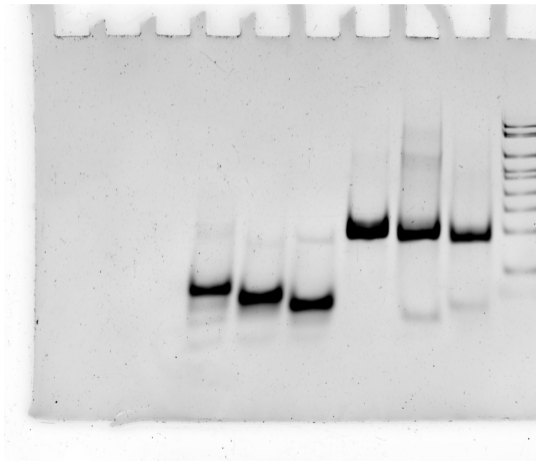

Supplement: d4cc05109b11.pdf [file d4cc05109b11.pdf]

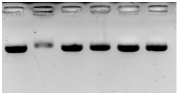

Supplement: d4cc05109b12.pdf [file d4cc05109b12.pdf]

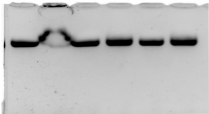

Supplement: d4cc05109b13.pdf [file d4cc05109b13.pdf]

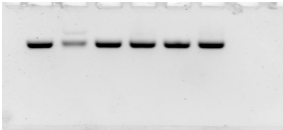

Supplement: d4cc05109b14.pdf [file d4cc05109b14.pdf]

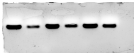

Supplement: d4cc05109b2.pdf [file d4cc05109b2.pdf]

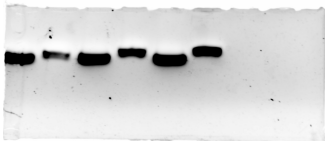

Supplement: d4cc05109b3.pdf [file d4cc05109b3.pdf]

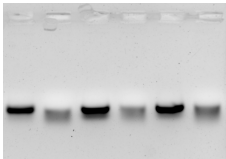

Supplement: d4cc05109b4.pdf [file d4cc05109b4.pdf]

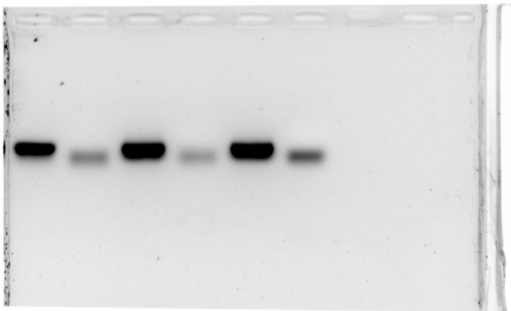

Supplement: d4cc05109b5.pdf [file d4cc05109b5.pdf]

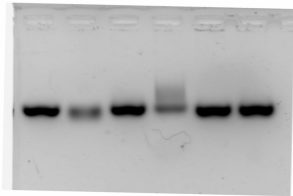

Supplement: d4cc05109b6.pdf [file d4cc05109b6.pdf]

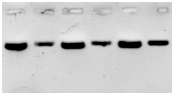

Supplement: d4cc05109b7.pdf [file d4cc05109b7.pdf]

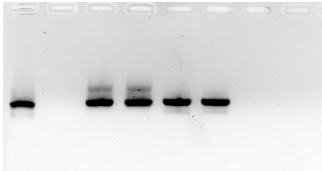

Supplement: d4cc05109b8.pdf [file d4cc05109b8.pdf]

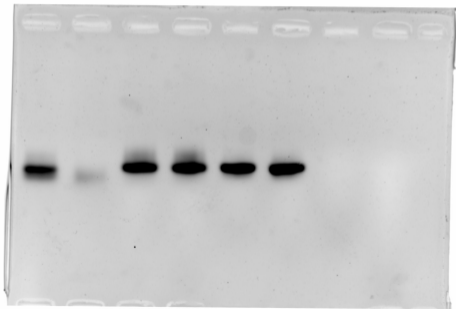

Supplement: d4cc05109b9.pdf [file d4cc05109b9.pdf]
